## P2710

# Anti-ischemic effect of 2-week cycle of heparin plus exercise-to-ischemia twice daily in patients with “no-option” angina: the CARHEXA trial

M.T. Petrovic<sup>1</sup>, A. Djordjevic-Dikic<sup>1</sup>, J. Stepanovic<sup>1</sup>, V. Giga<sup>1</sup>, N. Boskovic<sup>1</sup>, V. Vukcevic<sup>1</sup>, V. Cvetic<sup>2</sup>, A. Mladenovic<sup>2</sup>, O. Radmili<sup>2</sup>, Z. Markovic<sup>2</sup>, D. Kalimanovska-Ostic<sup>1</sup>, S. Stankovic<sup>3</sup>, M.C. Ostojic<sup>4</sup>, B. Beleslin<sup>1</sup>, E. Picano<sup>5</sup>

<sup>1</sup>Clinic for Cardiology, Clinical Center of Serbia, School of Medicine, University of Belgrade, Belgrade, Serbia; <sup>2</sup>Clinical center of Serbia, Radiology Department, Belgrade, Serbia; <sup>3</sup>Clinical center of Serbia, Department of Medical Biochemistry, Belgrade, Serbia; <sup>4</sup>Institute for Cardiovascular Diseases Dedinje, Belgrade, Serbia; <sup>5</sup>Institute of Clinical Physiology (IFC), Pisa, Italy

**Background:** Coronary collateral circulation (CCC) exerts protective effects on myocardial ischemia due to coronary artery disease (CAD), but the anti-ischemic, pro-CCC effects of exercise (E) with or without heparin (H) co-administration remain unclear.

**Purpose:** To establish the anti-ischemic functional efficacy of 2-week cycle of E-to-ischemia twice daily, with or without unfractionated i.v. H immediately before E, in patients with “no-option” CAD

**Methods:** In a prospective, single-center, parallel group study design we recruited 32 “no-option” patients (27 males; mean age of 61±8 years) with at least one chronically occluded coronary artery and stable angina, refractory to optimal medical management, not suitable for revascularization therapy and with E-induced ischemia. All underwent a 2-week cycle of E (2 E test per day, 5 days a week, for 2 weeks) and were randomized, with a double-blind design, to i.v. placebo (0.9% saline) versus unfractionated H (100 IU/kg up to a maximum of 5.000 IU iv, 10 min prior to E). Seat-

tle stable angina questionnaire (SAQ), 12-lead E-ECG for time-to-ischemia (treadmill exercise testing), and MDCT angiography for CCC imaging (Rentrop score, from 0= absent to 3= full opacification of occluded vessel) were assessed at entry and re-assessed after treatment for symptomatic, ECG, and anatomic end-points respectively.

**Results:** In H+E group (n=16), time to 1 mm ST segment depression (ST-D) increased, and CCC improved,  $p<0.05$ . On the contrary, no difference was observed in E group (n=16) in the pre-specified end-points ( $p>0.05$ ) (see table). Clinically important change of more 10 points in SAQ was observed regarding physical limitation, angina stability and disease perception in H+E patients, and in only angina frequency in E group.

**Conclusion:** A 2-week, 10 E test cycles are well tolerated and effective particularly with H in ameliorating symptoms, E-induced ischemia and CCC in “no-option” CAD patients with refractory angina.

The ECG and angiographic results

|                         | Heparin + Exercise | Placebo + Exercise |
|-------------------------|--------------------|--------------------|
| Rentrop baseline        | 0.73±0.88          | 1.06±1.06          |
| Rentrop 2-week          | 1.6±0.99*          | 1.19±1.05          |
| Time to ST-D base (s)   | 269±64             | 273±176            |
| Time to ST-D 2-week (s) | 328±65*            | 306±151            |

\* $p<0.05$ .
